# Supplementary material for: Adsorption of Ferritin at Nanofaceted Al2O3 Surfaces
Source: MDPI journal article supplement (doi:10.3390/ijms241612808), 2023-08-15
Supplement: s1 [file s1]

# Supplementary Materials

## Adsorption of Ferritin at Nanofaceted Al<sub>2</sub>O<sub>3</sub> Surfaces

*Bhanu K. Pothineni<sup>1,†</sup>, Sabrina Kollmann<sup>1,†</sup>, Xinyang Li<sup>1</sup>, Guido Grundmeier<sup>1</sup>, Denise J. Erb<sup>2,\*</sup>, and Adrian Keller<sup>1,\*</sup>*

<sup>1</sup> Technical and Macromolecular Chemistry, Paderborn University, Warburger Str. 100, 33098 Paderborn, Germany

<sup>2</sup> Ion Beam Center, Institute of Ion Beam Physics and Materials Research, Helmholtz-Zentrum Dresden-Rossendorf, 01328 Dresden, Germany

<sup>†</sup> These authors contributed equally.

\* Correspondence: [d.erb@hzdr.de](mailto:d.erb@hzdr.de) (D.J.E.); [adrian.keller@uni-paderborn.de](mailto:adrian.keller@uni-paderborn.de) (A.K.); Tel.: +49-351-260-2898 (D.J.E.); Tel.: +49-5251-60-5722 (A.K.)

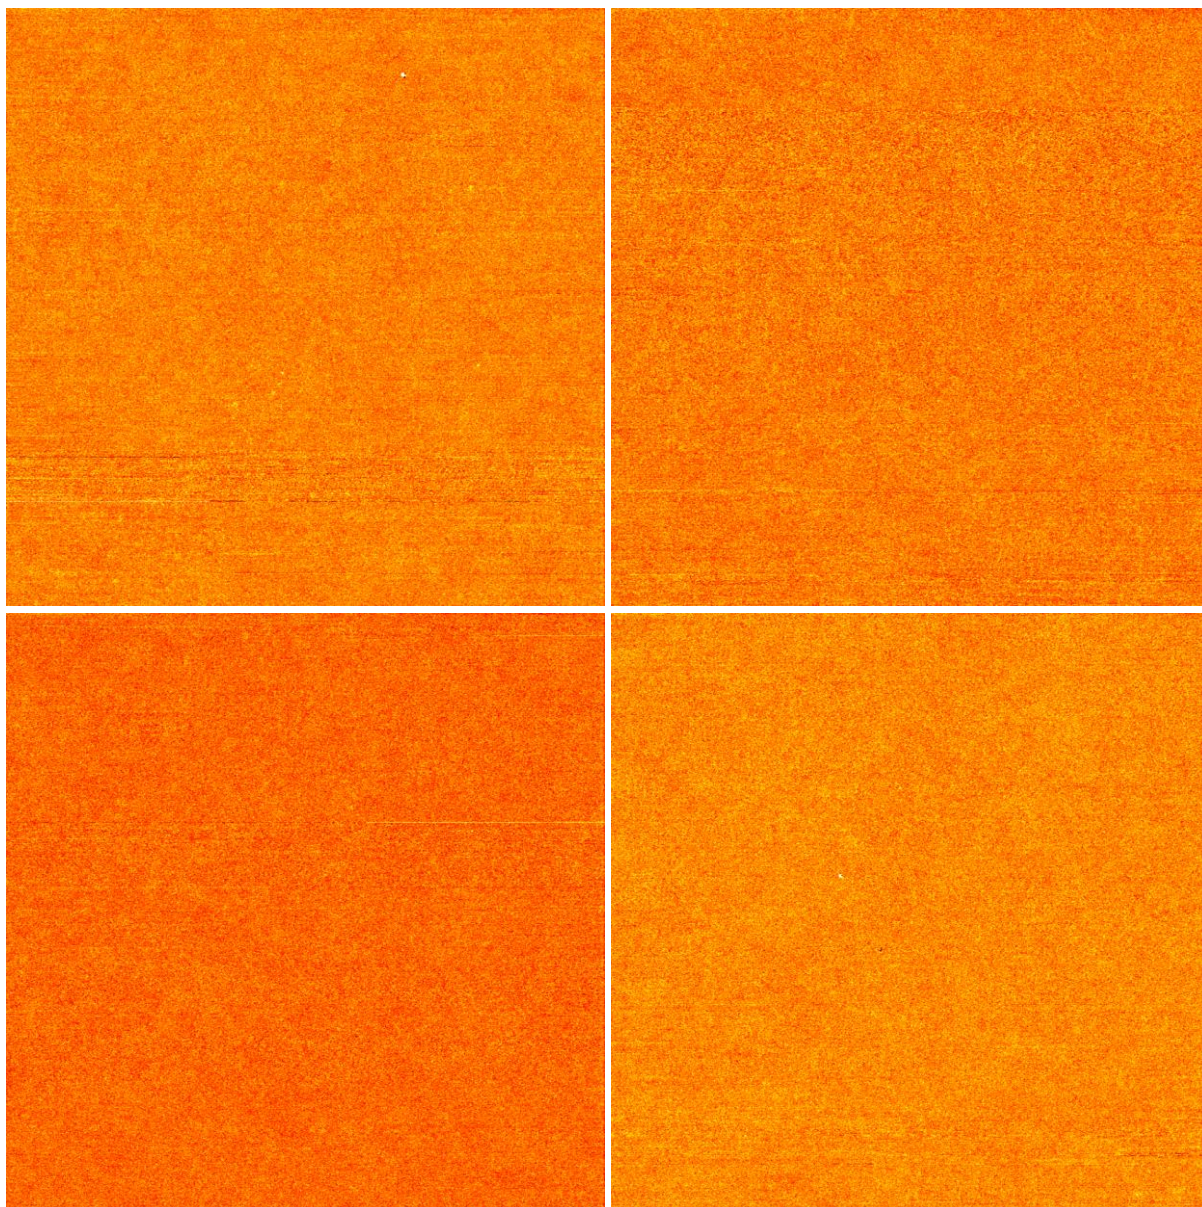

**Figure S1:** Additional AFM topography images of flat  $\text{Al}_2\text{O}_3$  substrates before ferritin adsorption. The images have a size of  $3 \times 3 \mu\text{m}^2$  and the maximum of the height scales is 4 nm.

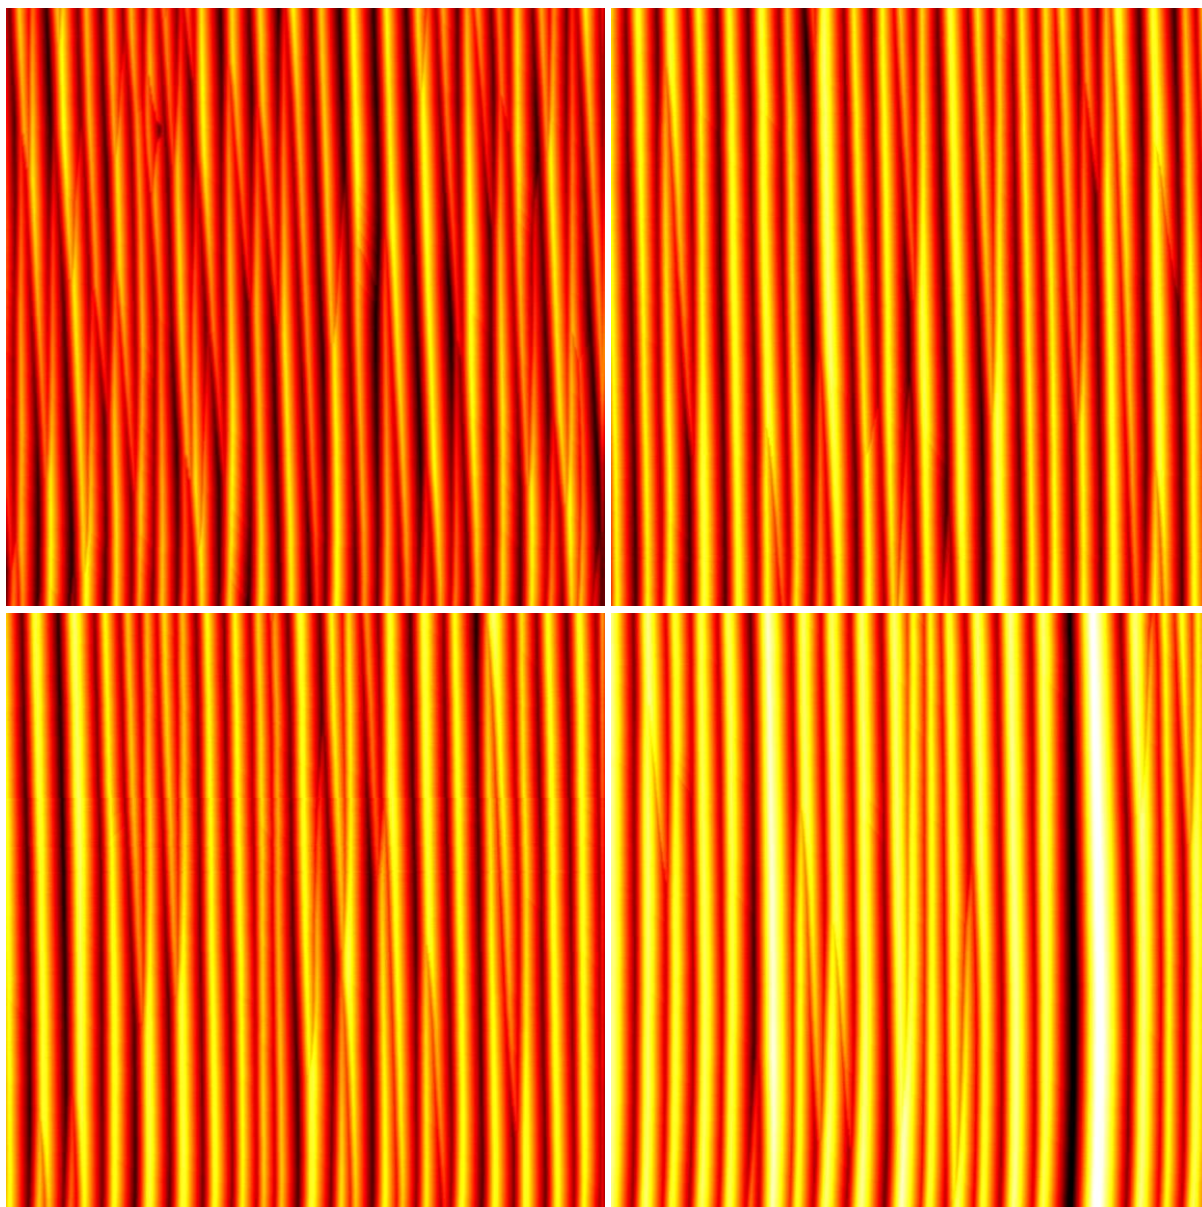

**Figure S2:** Additional AFM topography images of nanofaceted Al<sub>2</sub>O<sub>3</sub> substrates annealed at 1300 °C before ferritin adsorption. The images have a size of 3 x 3  $\mu\text{m}^2$  and the maximum of the height scales is 50 nm.



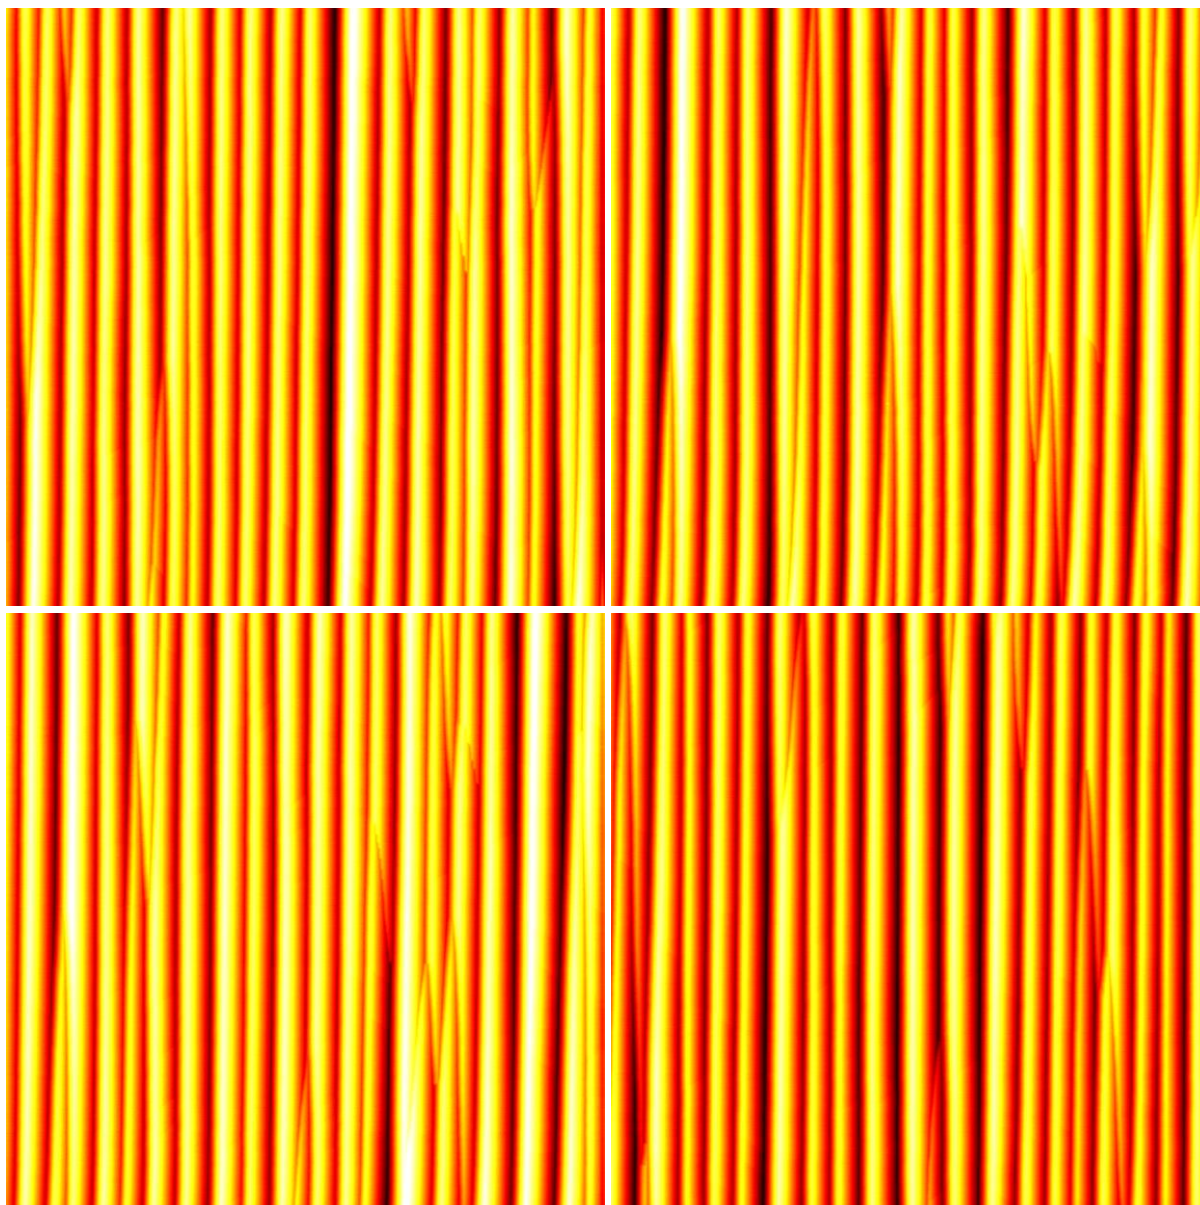

**Figure S3:** Additional AFM topography images of nanofaceted  $\text{Al}_2\text{O}_3$  substrates annealed at  $1400\text{ }^\circ\text{C}$  before ferritin adsorption. The images have a size of  $3 \times 3\text{ }\mu\text{m}^2$  and the maximum of the height scales is  $50\text{ nm}$ .

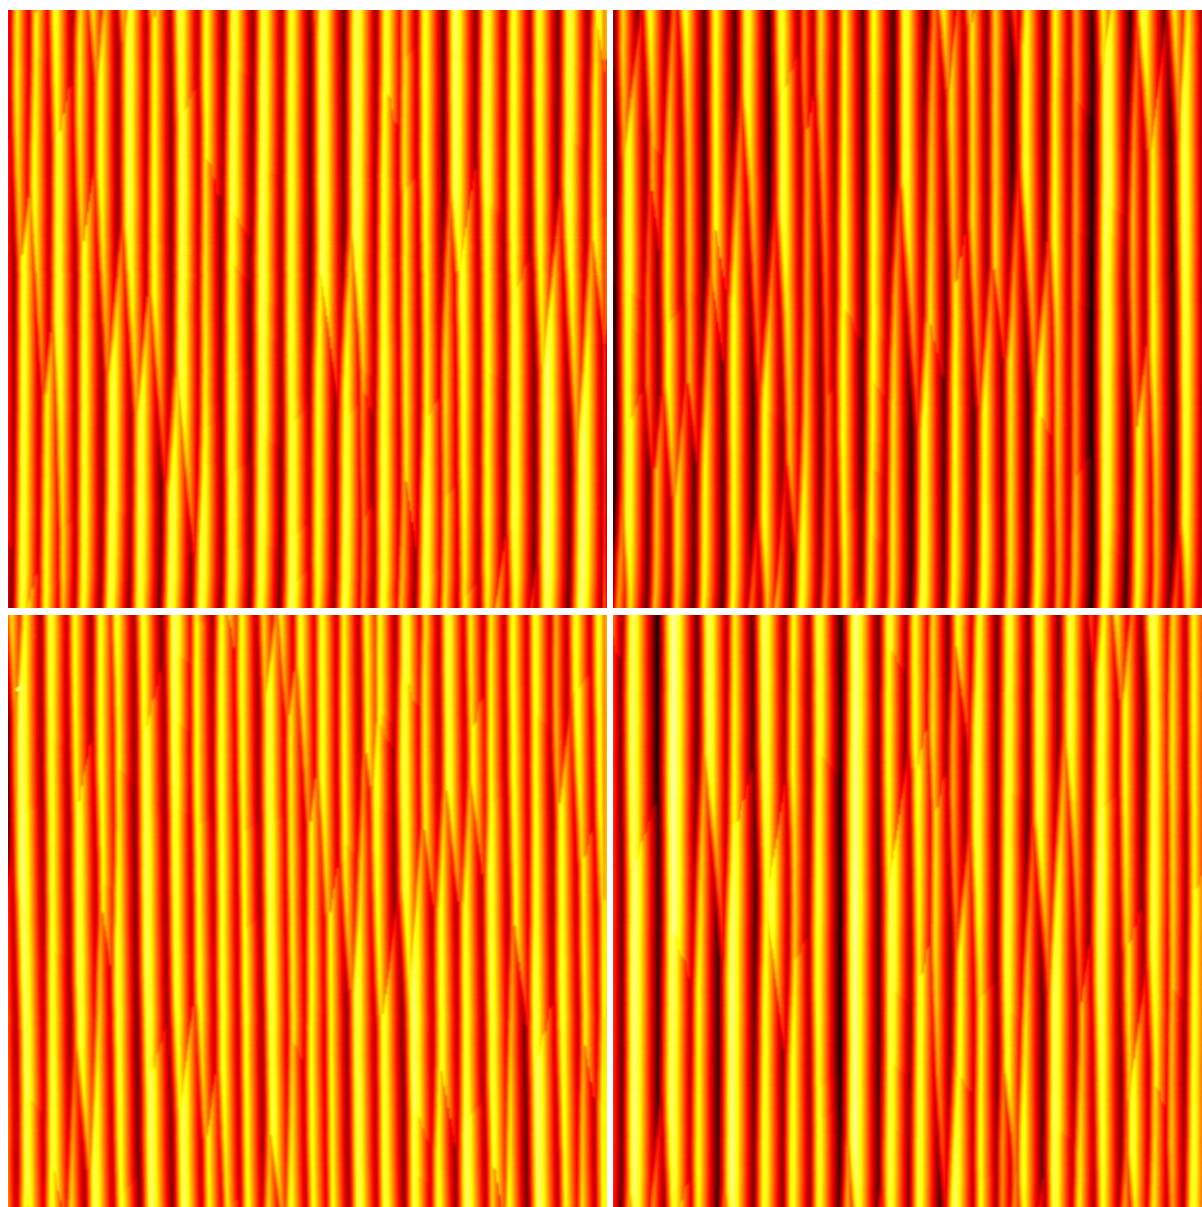

**Figure S4:** Additional AFM topography images of nanofaceted  $\text{Al}_2\text{O}_3$  substrates annealed at 1500 °C before ferritin adsorption. The images have a size of  $3 \times 3 \mu\text{m}^2$  and the maximum of the height scales is 50 nm.



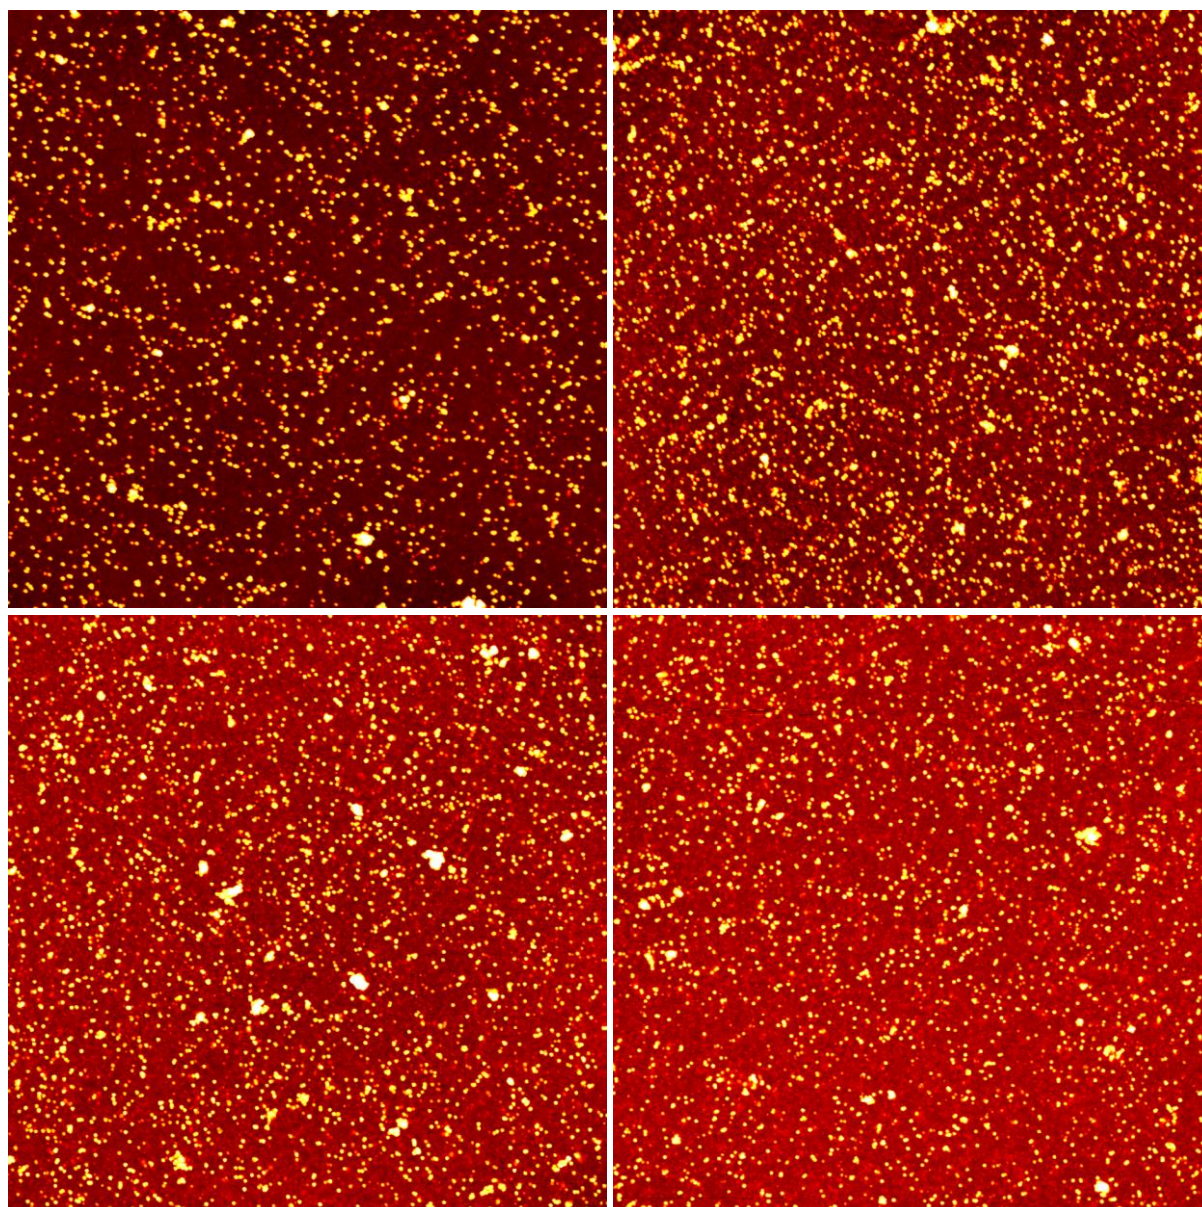

**Figure S5:** Additional AFM topography images of flat Al<sub>2</sub>O<sub>3</sub> substrates after ferritin adsorption at 10 mg/ml. The images have a size of 3 x 3  $\mu\text{m}^2$  and the maximum of the height scales is 12 nm.



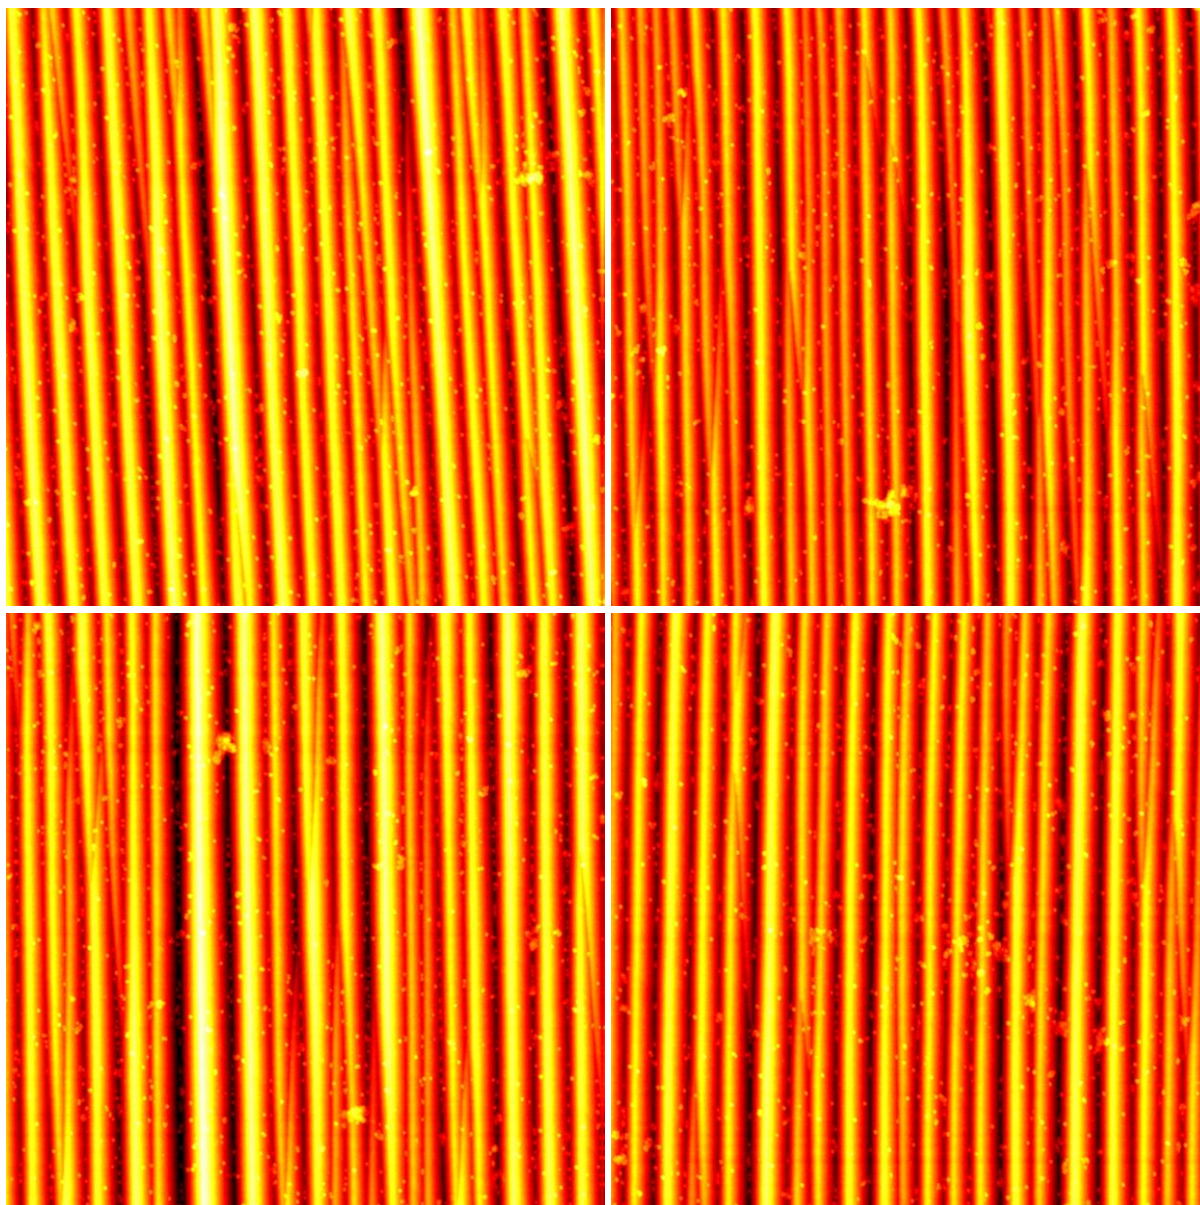

**Figure S6:** Additional AFM topography images of nanofaceted  $\text{Al}_2\text{O}_3$  substrates annealed at 1300 °C after ferritin adsorption at 10 mg/ml. The images have a size of  $3 \times 3 \mu\text{m}^2$  and the maximum of the height scales is 50 nm.

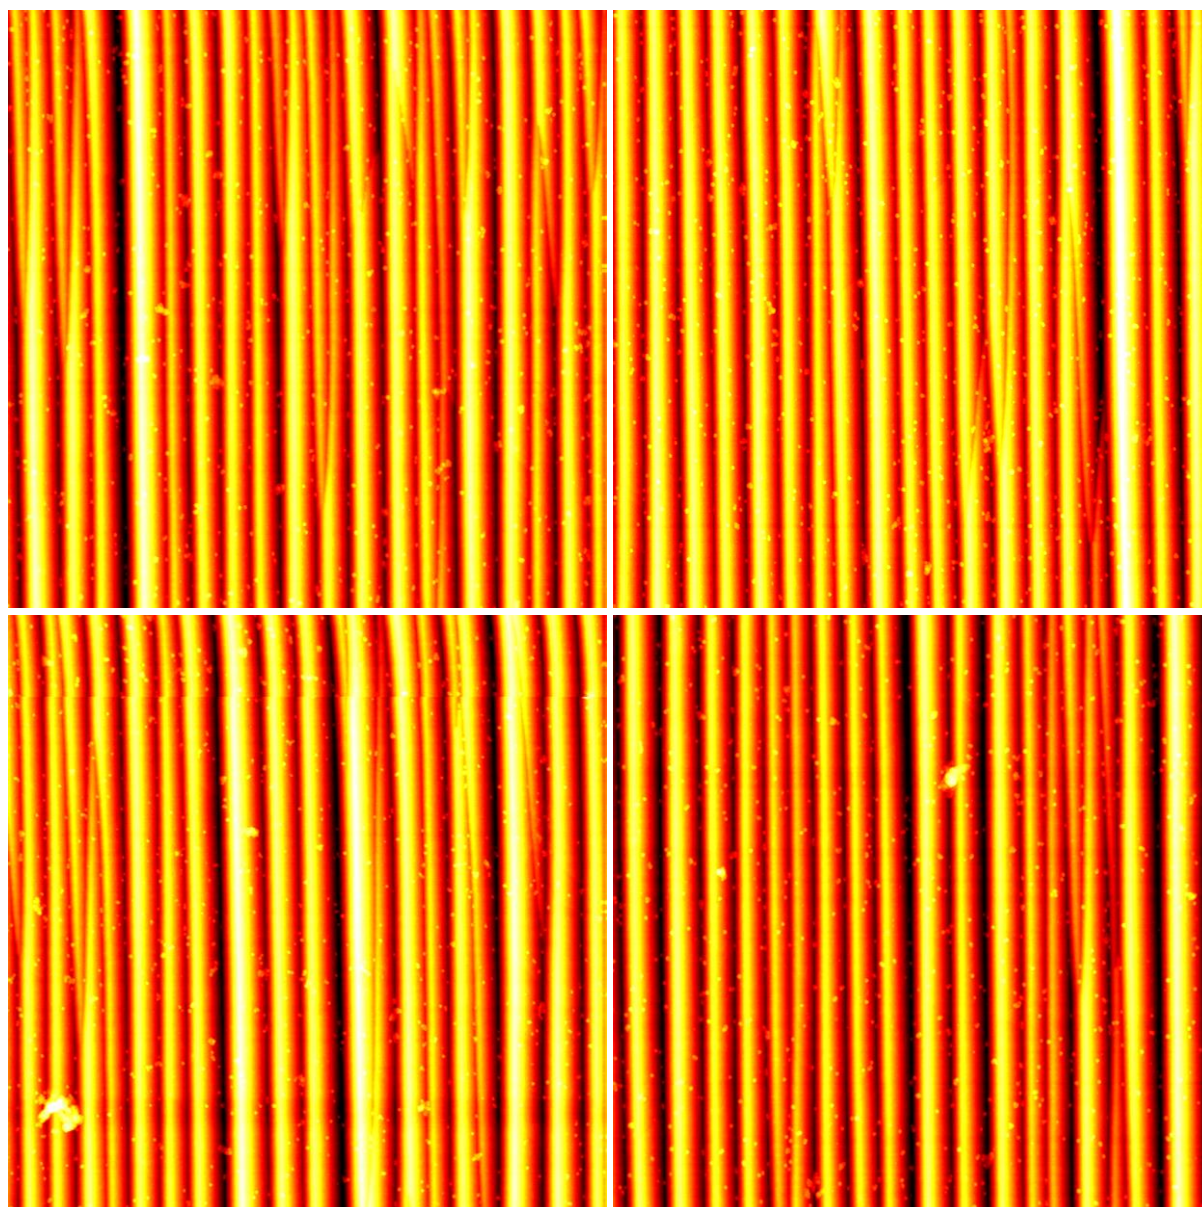

**Figure S7:** Additional AFM topography images of nanofaceted  $\text{Al}_2\text{O}_3$  substrates annealed at  $1400\text{ }^\circ\text{C}$  after ferritin adsorption at  $10\text{ mg/ml}$ . The images have a size of  $3 \times 3\text{ }\mu\text{m}^2$  and the maximum of the height scales is  $50\text{ nm}$ .



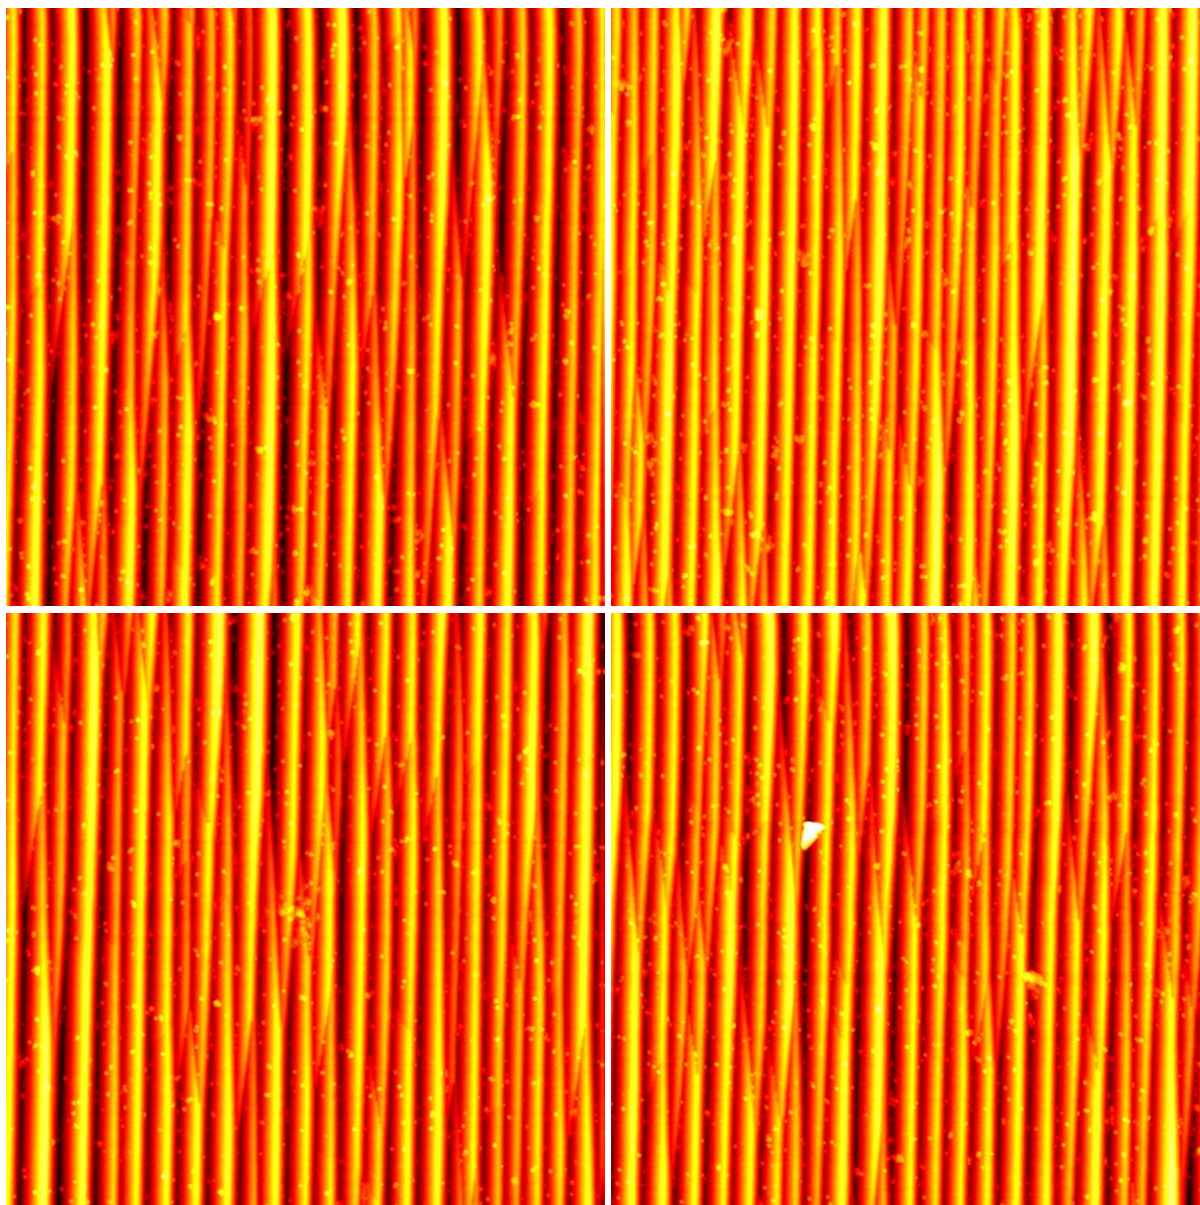

**Figure S8:** Additional AFM topography images of nanofaceted  $\text{Al}_2\text{O}_3$  substrates annealed at 1500 °C after ferritin adsorption at 10 mg/ml. The images have a size of  $3 \times 3 \mu\text{m}^2$  and the maximum of the height scales is 50 nm.

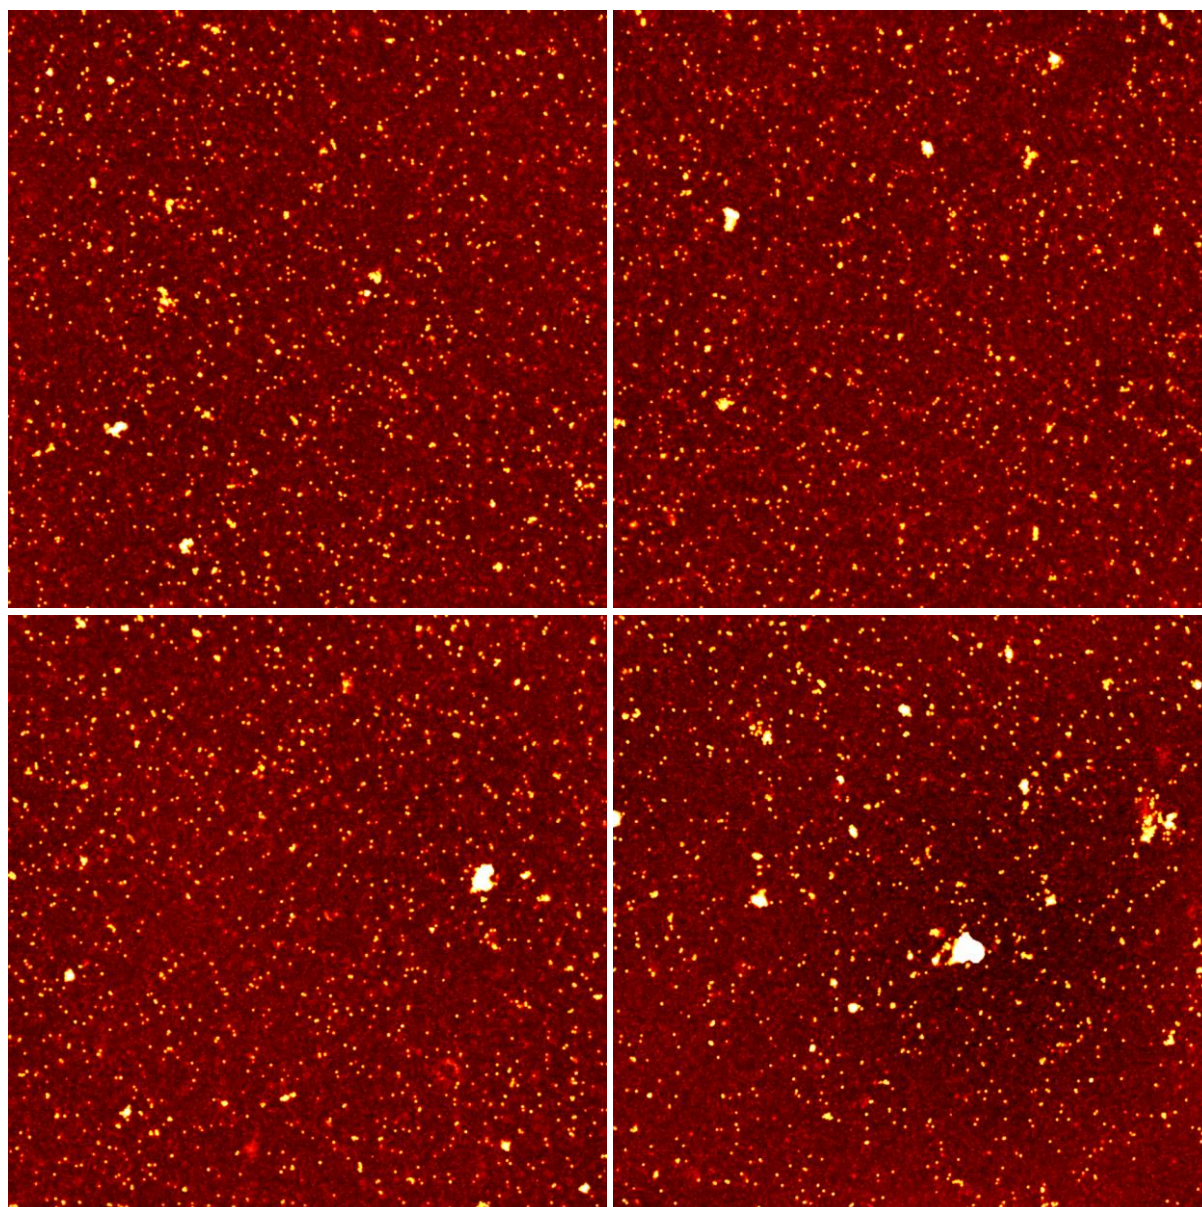

**Figure S9:** Additional AFM topography images of flat  $\text{Al}_2\text{O}_3$  substrates after ferritin adsorption at 30 mg/ml. The images have a size of  $3 \times 3 \mu\text{m}^2$  and the maximum of the height scales is 12 nm.



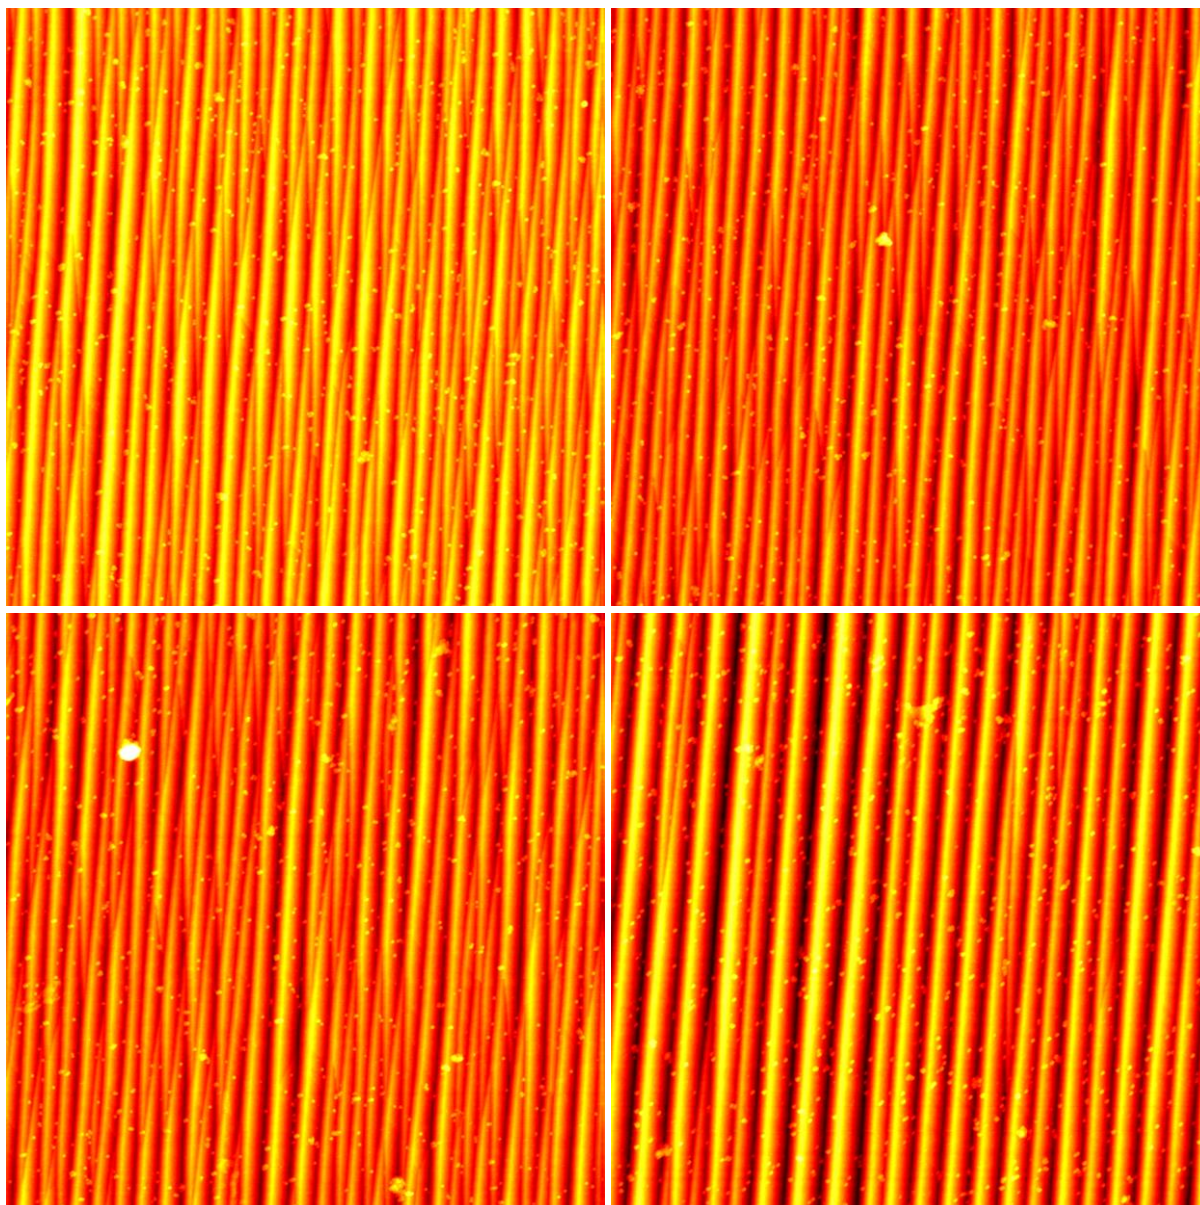

**Figure S10:** Additional AFM topography images of nanofaceted  $\text{Al}_2\text{O}_3$  substrates annealed at 1300 °C after ferritin adsorption at 30 mg/ml. The images have a size of  $3 \times 3 \mu\text{m}^2$  and the maximum of the height scales is 50 nm.

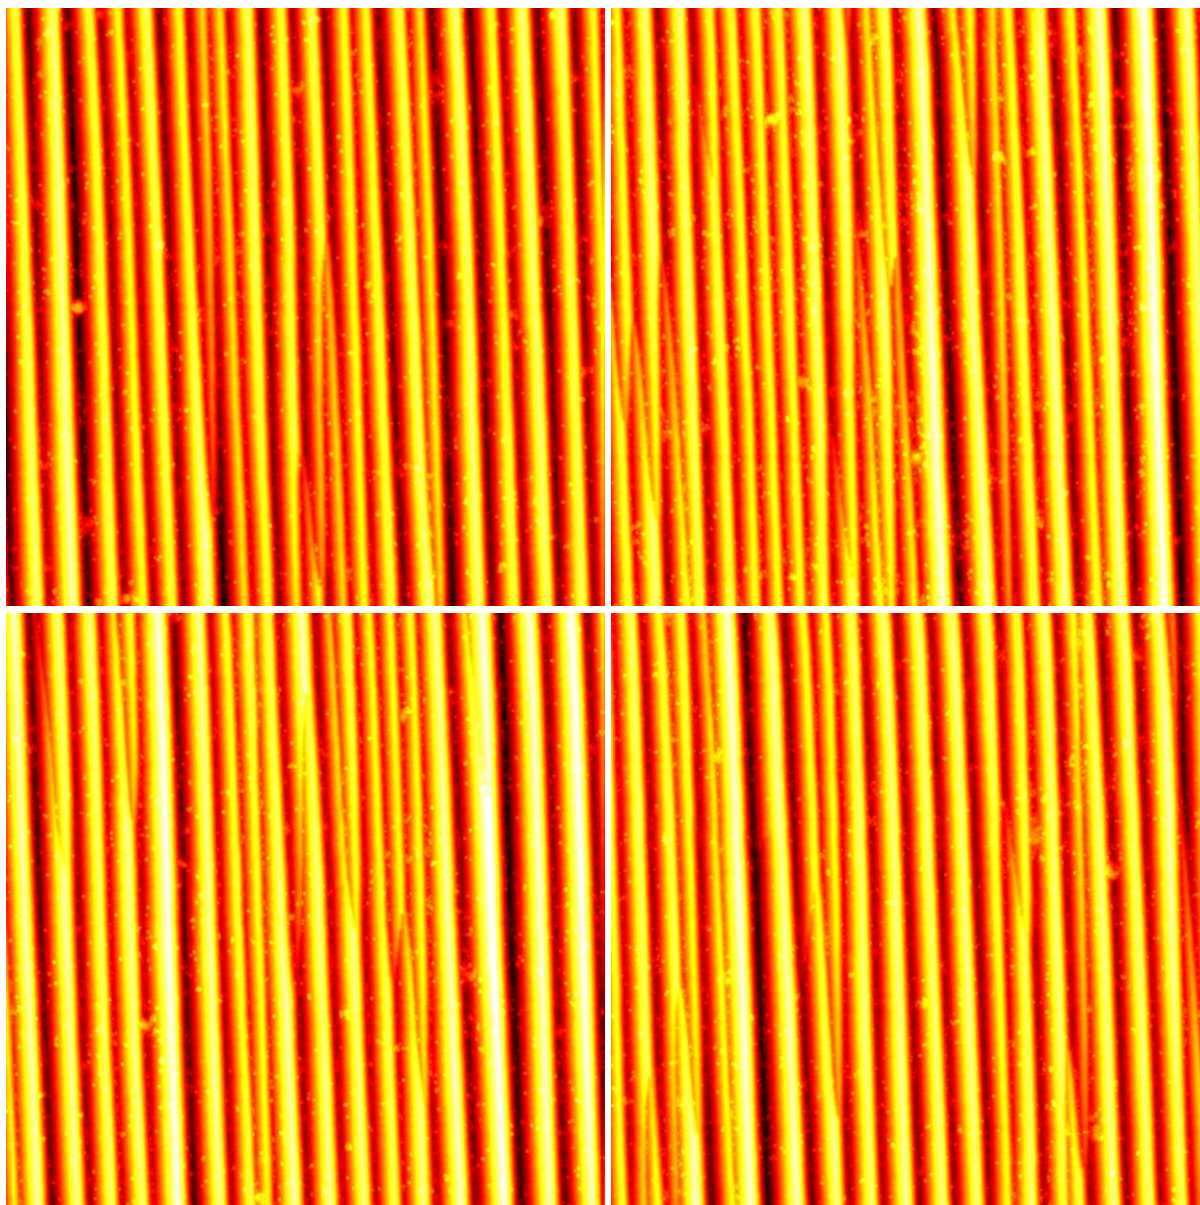

**Figure S11:** Additional AFM topography images of nanofaceted  $\text{Al}_2\text{O}_3$  substrates annealed at 1400 °C after ferritin adsorption at 30 mg/ml. The images have a size of  $3 \times 3 \mu\text{m}^2$  and the maximum of the height scales is 50 nm.



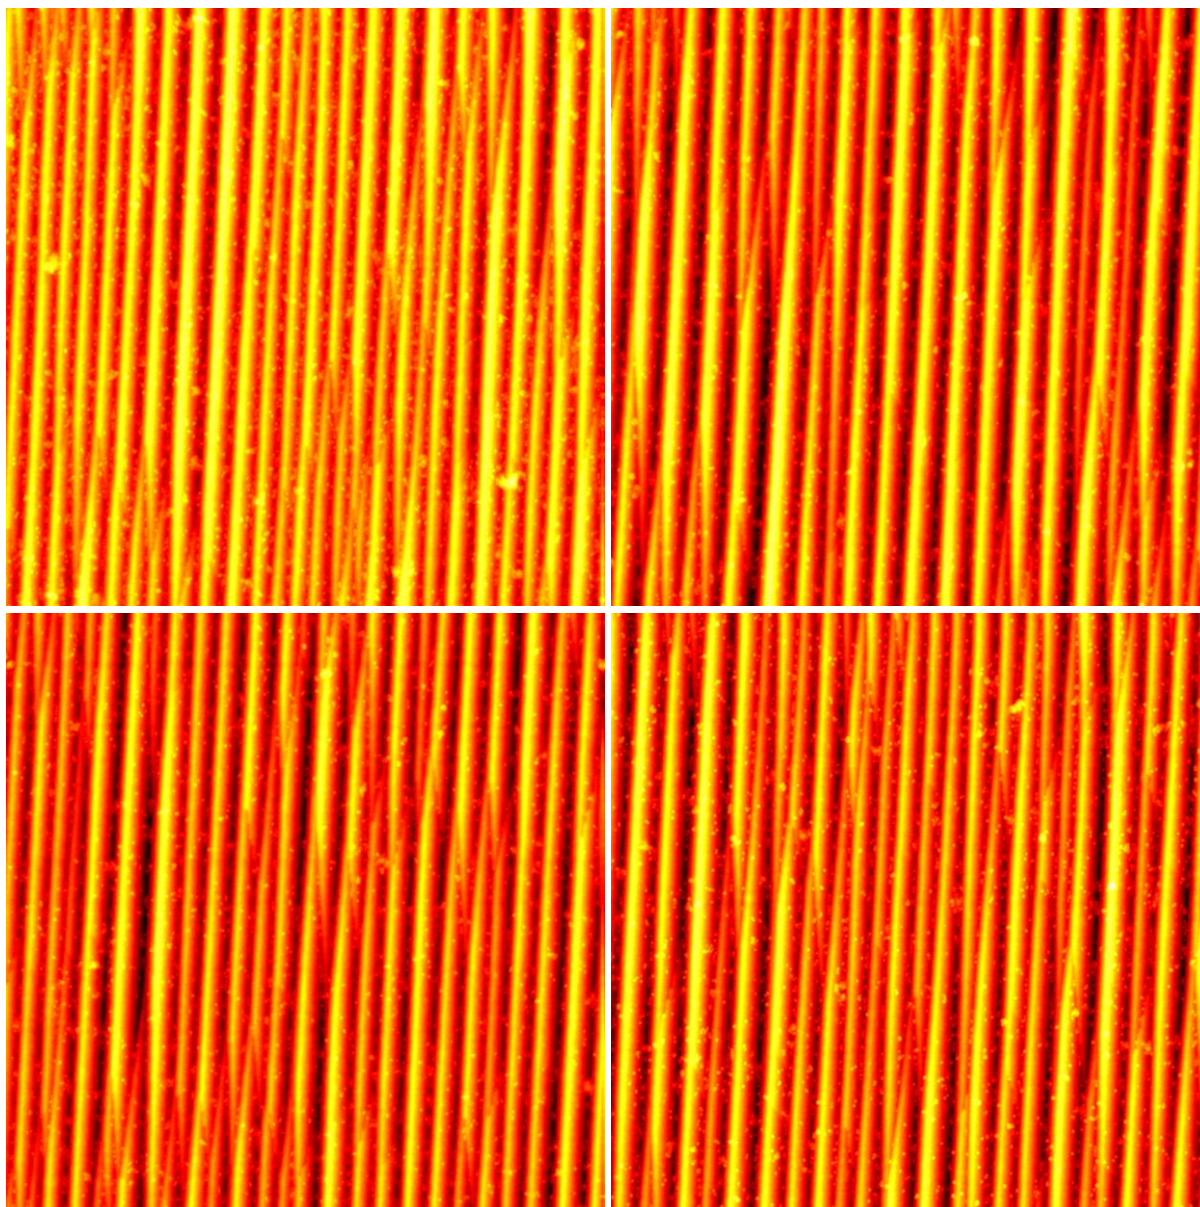

**Figure S12:** Additional AFM topography images of nanofaceted  $\text{Al}_2\text{O}_3$  substrates annealed at 1500 °C after ferritin adsorption at 30 mg/ml. The images have a size of  $3 \times 3 \mu\text{m}^2$  and the maximum of the height scales is 50 nm.

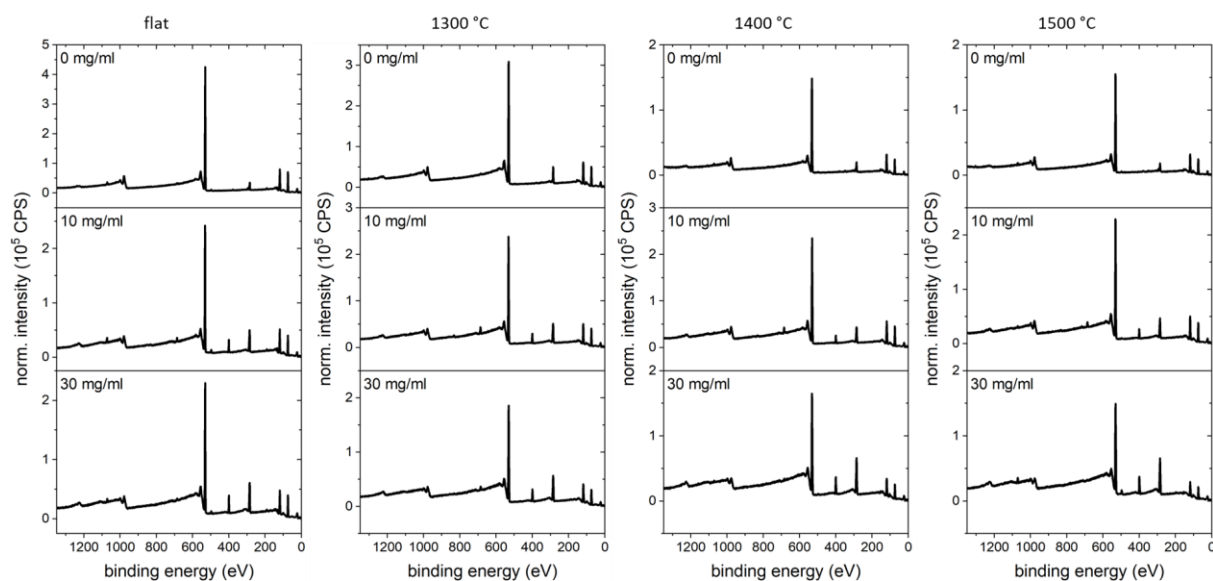

**Figure S13:** Survey spectra of the four  $\text{Al}_2\text{O}_3$  substrate surfaces before and after ferritin adsorption at 10 and 30 mg/ml, respectively.

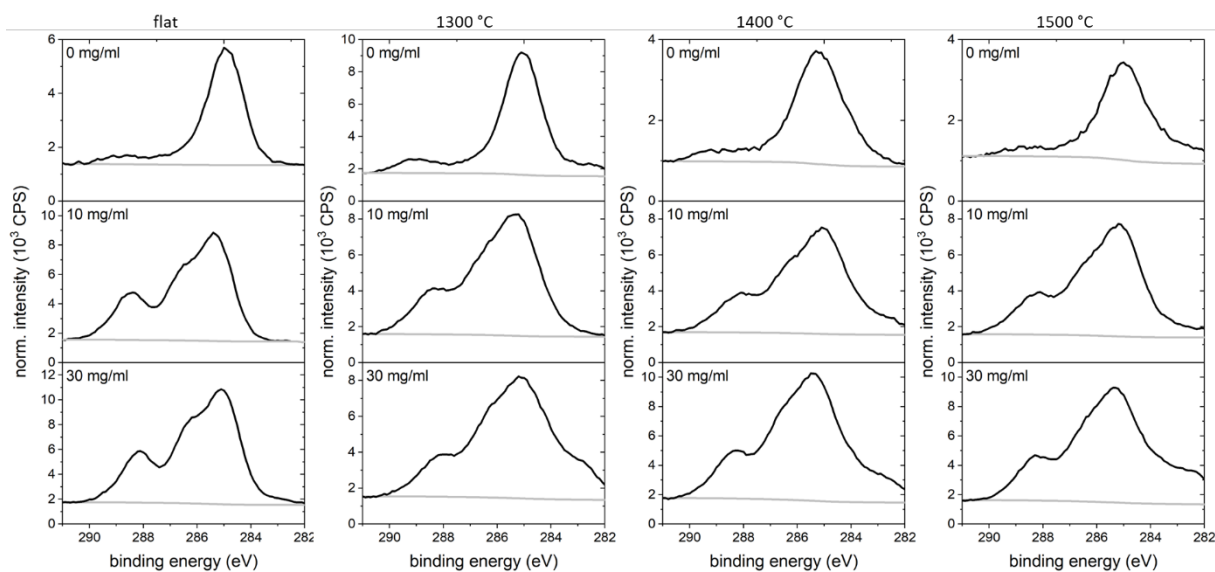

**Figure S14:** High-resolution C 1s spectra of the four  $\text{Al}_2\text{O}_3$  substrate surfaces before and after ferritin adsorption at 10 and 30 mg/ml, respectively. The background used for quantification is indicated in grey.



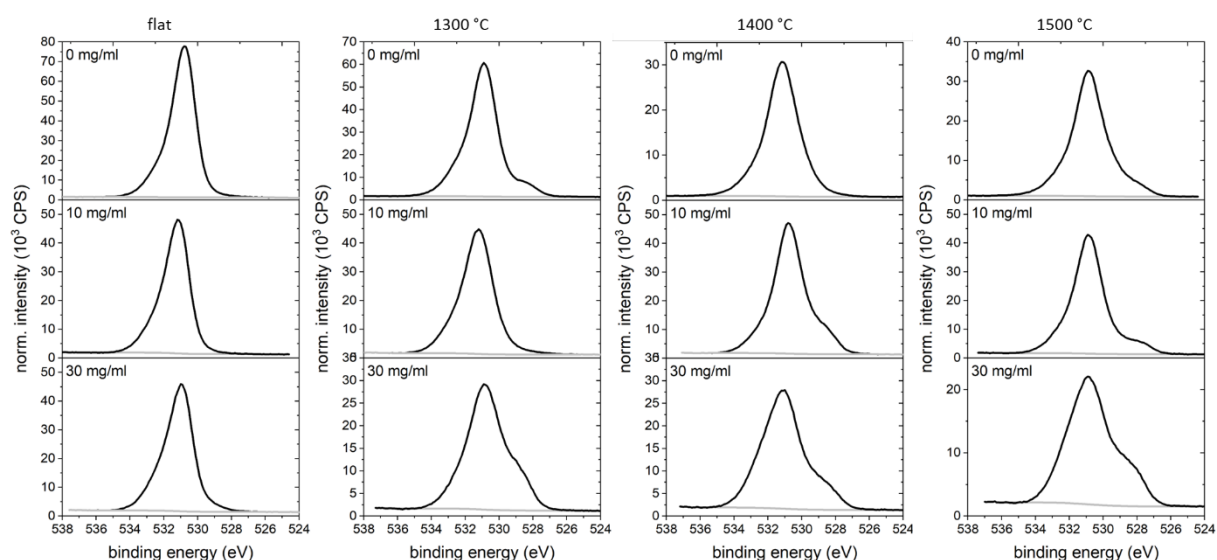

**Figure S15:** High-resolution O 1s spectra of the four Al<sub>2</sub>O<sub>3</sub> substrate surfaces before and after ferritin adsorption at 10 and 30 mg/ml, respectively. The background used for quantification is indicated in grey.

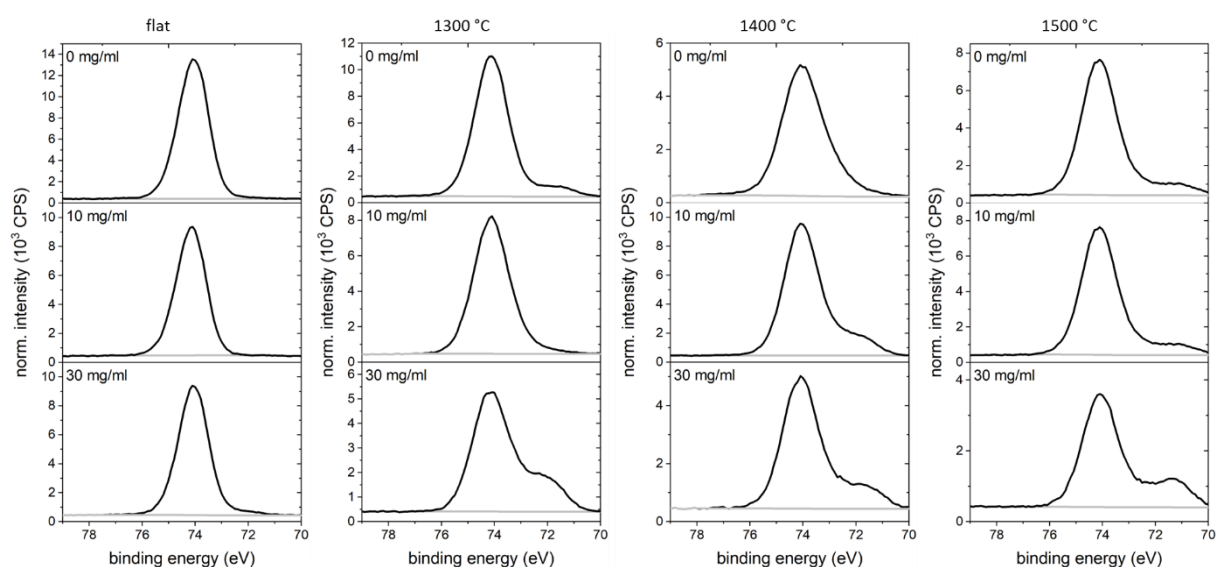

**Figure S16:** High-resolution Al 2p spectra of the four Al<sub>2</sub>O<sub>3</sub> substrate surfaces before and after ferritin adsorption at 10 and 30 mg/ml, respectively. The background used for quantification is indicated in grey.

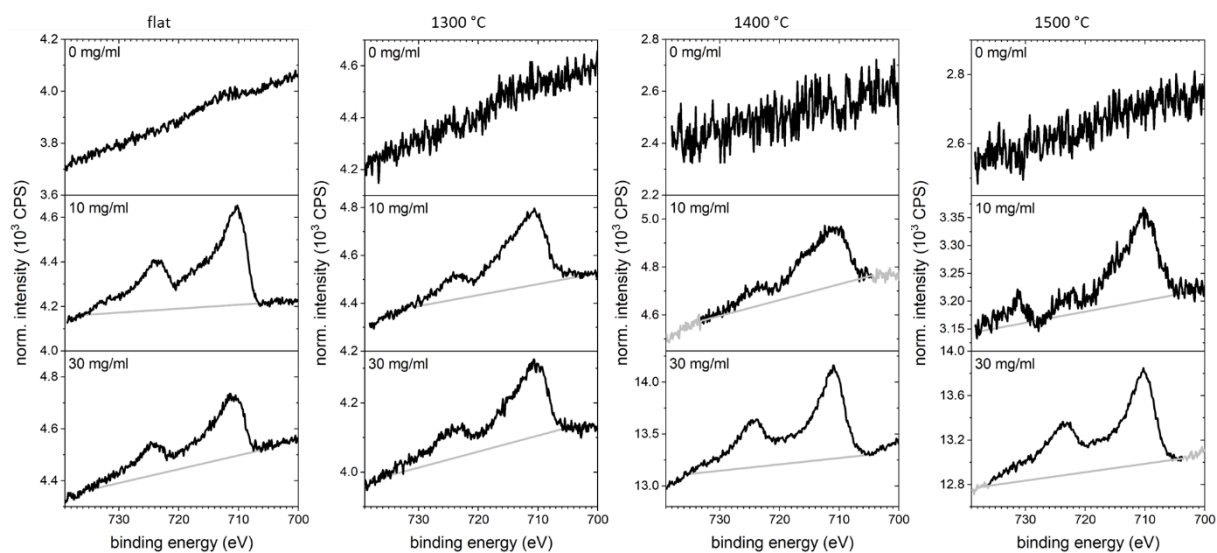

**Figure S17:** High-resolution Fe 2p spectra of the four Al<sub>2</sub>O<sub>3</sub> substrate surfaces before and after ferritin adsorption at 10 and 30 mg/ml, respectively. The background used for quantification is indicated in grey.
